# Supplementary material for: Integrated Omic Analysis of Human Plasma Metabolites and Microbiota in a Hypertension Cohort
Source: MDPI journal article supplement (doi:10.3390/nu15092074), 2023-04-25
Supplement: s1 [file s1]

## Supplemental tables

**Table S1 Area Under Curve of ES (-)**

| Metabolite ID | Metabolite name                                    | Area  | Standard error <sup>a</sup> | Asymptotic Significance <sup>b</sup> | Asymptotic 95%confidence interval |             |
|---------------|----------------------------------------------------|-------|-----------------------------|--------------------------------------|-----------------------------------|-------------|
|               |                                                    |       |                             |                                      | Lower Limit                       | Upper Limit |
| M0320         | epi-jasmonic acid                                  | 0.681 | 0.069                       | 0.012                                | 0.545                             | 0.817       |
| M0147         | Maltitol                                           | 0.646 | 0.070                       | 0.042                                | 0.508                             | 0.784       |
| M0099         | Chlorphentermine                                   | 0.716 | 0.062                       | 0.003                                | 0.595                             | 0.838       |
| M0290         | Crotonic acid                                      | 0.669 | 0.069                       | 0.018                                | 0.534                             | 0.804       |
| M0144         | 2-Deoxyhexopyranose                                | 0.654 | 0.067                       | 0.032                                | 0.523                             | 0.784       |
| M0376         | (E)-4-Methoxycinnamic acid                         | 0.696 | 0.065                       | 0.006                                | 0.567                             | 0.824       |
| M0321         | guaietolin                                         | 0.673 | 0.068                       | 0.016                                | 0.539                             | 0.807       |
| M0075         | (E)-3,4,5-Trimethoxycinnamic acid                  | 0.663 | 0.069                       | 0.023                                | 0.528                             | 0.799       |
| M0271         | LU3453000                                          | 0.683 | 0.069                       | 0.010                                | 0.549                             | 0.818       |
| M0088         | 3-Hydroxy-3-(2,3,4-trimethoxyphenyl)propanoic acid | 0.670 | 0.069                       | 0.018                                | 0.535                             | 0.804       |
| M0021         | DL-Lactic Acid                                     | 0.631 | 0.071                       | 0.069                                | 0.491                             | 0.770       |
| M0259         | (2S)-2-Amino-8-hydroxyoctanoic acid                | 0.708 | 0.062                       | 0.004                                | 0.585                             | 0.830       |
| M0282         | S-3-oxodecanoyl cysteamine                         | 0.731 | 0.062                       | 0.001                                | 0.610                             | 0.852       |
| M0253         | Guvacine                                           | 0.675 | 0.073                       | 0.015                                | 0.531                             | 0.818       |
| M0233         | 2-Amino-3-hydroxyoctadecyl dihydrogen phosphate    | 0.645 | 0.069                       | 0.043                                | 0.510                             | 0.780       |
| M0062         | Sphingosine 1-phosphate                            | 0.647 | 0.071                       | 0.041                                | 0.508                             | 0.785       |
| M0221         | Lauramide                                          | 0.680 | 0.068                       | 0.012                                | 0.546                             | 0.814       |
| M0268         | 4-Methylcarbostyryl                                | 0.651 | 0.069                       | 0.036                                | 0.515                             | 0.787       |
| M0310         | Umbelliferone                                      | 0.655 | 0.069                       | 0.031                                | 0.519                             | 0.790       |
| M0155         | 1-O-                                               | 0.640 | 0.071                       | 0.051                                | 0.502                             | 0.779       |

|       |                         |       |       |       |       |       |
|-------|-------------------------|-------|-------|-------|-------|-------|
|       | Arsonopentofuranose     |       |       |       |       |       |
| M0058 | 2,4-Dichlorotoluene     | 0.631 | 0.067 | 0.069 | 0.499 | 0.763 |
| M0222 | N-dodecanoylsphinganine | 0.696 | 0.069 | 0.006 | 0.561 | 0.830 |
| M0029 | methadone-d9            | 0.659 | 0.072 | 0.026 | 0.518 | 0.801 |
| M0063 | DL-Arginine             | 0.675 | 0.068 | 0.014 | 0.542 | 0.809 |

**Table S2 Area Under Curve of ES (+)**

| Metabolite ID | Metabolite name                                                              | Area  | Standard error <sup>a</sup> | Asymptotic Significance <sup>b</sup> | Asymptotic 95%confidence interval |             |
|---------------|------------------------------------------------------------------------------|-------|-----------------------------|--------------------------------------|-----------------------------------|-------------|
|               |                                                                              |       |                             |                                      | Lower Limit                       | Upper Limit |
| M0386         | 4-Coumaric acid                                                              | 0.655 | 0.074                       | 0.031                                | 0.509                             | 0.801       |
| M0347         | epi-jasmonic acid                                                            | 0.681 | 0.069                       | 0.012                                | 0.545                             | 0.817       |
| M0192         | 2-Deoxyhexopyranose                                                          | 0.679 | 0.071                       | 0.013                                | 0.539                             | 0.818       |
| M0128         | Hexitol                                                                      | 0.655 | 0.073                       | 0.031                                | 0.511                             | 0.799       |
| M0200         | Maltitol                                                                     | 0.645 | 0.070                       | 0.043                                | 0.507                             | 0.783       |
| M0186         | Hydroxytriazolam                                                             | 0.708 | 0.069                       | 0.004                                | 0.572                             | 0.843       |
| M0124         | Chlorphentermine                                                             | 0.716 | 0.062                       | 0.003                                | 0.595                             | 0.838       |
| M0247         | (2Z)-3-{5-[(4Z)-5-(Methylsulfanyl)-4-penten-2-yn-1-yl]-2-furyl}acrylaldehyde | 0.632 | 0.070                       | 0.065                                | 0.494                             | 0.770       |
| M0312         | D-(+)-Maltose                                                                | 0.628 | 0.071                       | 0.074                                | 0.489                             | 0.767       |
| M0348         | guaietolin                                                                   | 0.673 | 0.068                       | 0.016                                | 0.539                             | 0.807       |
| M0091         | 3-(6,7-Dimethoxy-1,3-benzodioxol-5-yl)-2-propen-1-ol                         | 0.663 | 0.069                       | 0.023                                | 0.528                             | 0.799       |
| M0105         | P-Gal                                                                        | 0.670 | 0.069                       | 0.018                                | 0.535                             | 0.804       |
| M0307         | S-3-oxodecanoyl cysteamine                                                   | 0.731 | 0.062                       | 0.001                                | 0.610                             | 0.852       |
| M0289         | (2S)-2-Amino-4-hexynoic acid                                                 | 0.670 | 0.073                       | 0.018                                | 0.527                             | 0.813       |
| M0240         | 1-[(1Z,9Z)-octadecadienyl]-sn-glycero-3-phosphocholine                       | 0.659 | 0.075                       | 0.027                                | 0.512                             | 0.805       |
| M0261         | 2-Amino-3-hydroxyoctadecyl dihydrogen phosphate                              | 0.645 | 0.069                       | 0.043                                | 0.510                             | 0.780       |
| M0066         | D-Erythro-sphingosine 1-phosphate                                            | 0.649 | 0.071                       | 0.038                                | 0.511                             | 0.787       |
| M0250         | Lauramide                                                                    | 0.680 | 0.068                       | 0.012                                | 0.546                             | 0.814       |
| M0003         | 1-[(11Z)-octadecenoyl]-sn-                                                   | 0.657 | 0.074                       | 0.029                                | 0.512                             | 0.802       |

|       |                                   |       |       |       |       |       |
|-------|-----------------------------------|-------|-------|-------|-------|-------|
|       | glycero-3-phosphocholine          |       |       |       |       |       |
| M0298 | 4-Methylcarbostyryl               | 0.651 | 0.069 | 0.036 | 0.515 | 0.787 |
| M0338 | 4-Hydroxycoumarin                 | 0.655 | 0.069 | 0.031 | 0.519 | 0.790 |
| M0180 | 1-O-Arsonopentofuranose           | 0.640 | 0.071 | 0.051 | 0.502 | 0.779 |
| M0067 | 2,4-Dichlorotoluene               | 0.631 | 0.067 | 0.069 | 0.499 | 0.763 |
| M0106 | 4-Hydroxycyclophosphamide         | 0.713 | 0.063 | 0.003 | 0.590 | 0.837 |
| M0251 | N-dodecanoylsphinganine           | 0.696 | 0.069 | 0.006 | 0.561 | 0.830 |
| M0160 | Benzothiazole                     | 0.742 | 0.058 | 0.001 | 0.628 | 0.856 |
| M0069 | DL-Arginine                       | 0.675 | 0.068 | 0.014 | 0.542 | 0.809 |
| M0205 | methyl isoquinoline-3-carboxylate | 0.671 | 0.064 | 0.017 | 0.545 | 0.797 |

**Table S3 Chi-squared test**

|                                    | Value               | df | Asymptotic Significance<br>( 2-sided ) | Exact Sig.<br>(2-sided) | Exact Sig.<br>(1-sided) |
|------------------------------------|---------------------|----|----------------------------------------|-------------------------|-------------------------|
| Pearson chi-squared                | 14.256 <sup>a</sup> | 1  | 0.000160                               |                         |                         |
| Continuity Correction <sup>b</sup> | 13.610              | 1  | 0.000225                               |                         |                         |
| Likelihood Ratio                   | 14.350              | 1  | 0.000152                               |                         |                         |
| Fisher's Exact Test                |                     |    |                                        | 0.000188                | 0.000108                |
| Linear-by-Linear<br>Association    | 14.237              | 1  | 0.000161                               |                         |                         |
| N of Valid Cases                   | 737                 |    |                                        |                         |                         |

a. 0 cells (0.0%) have expected count less than 5. The minimum expected count is 86.19.

b. Computed only for a 2x2 table.

## Supplemental figures

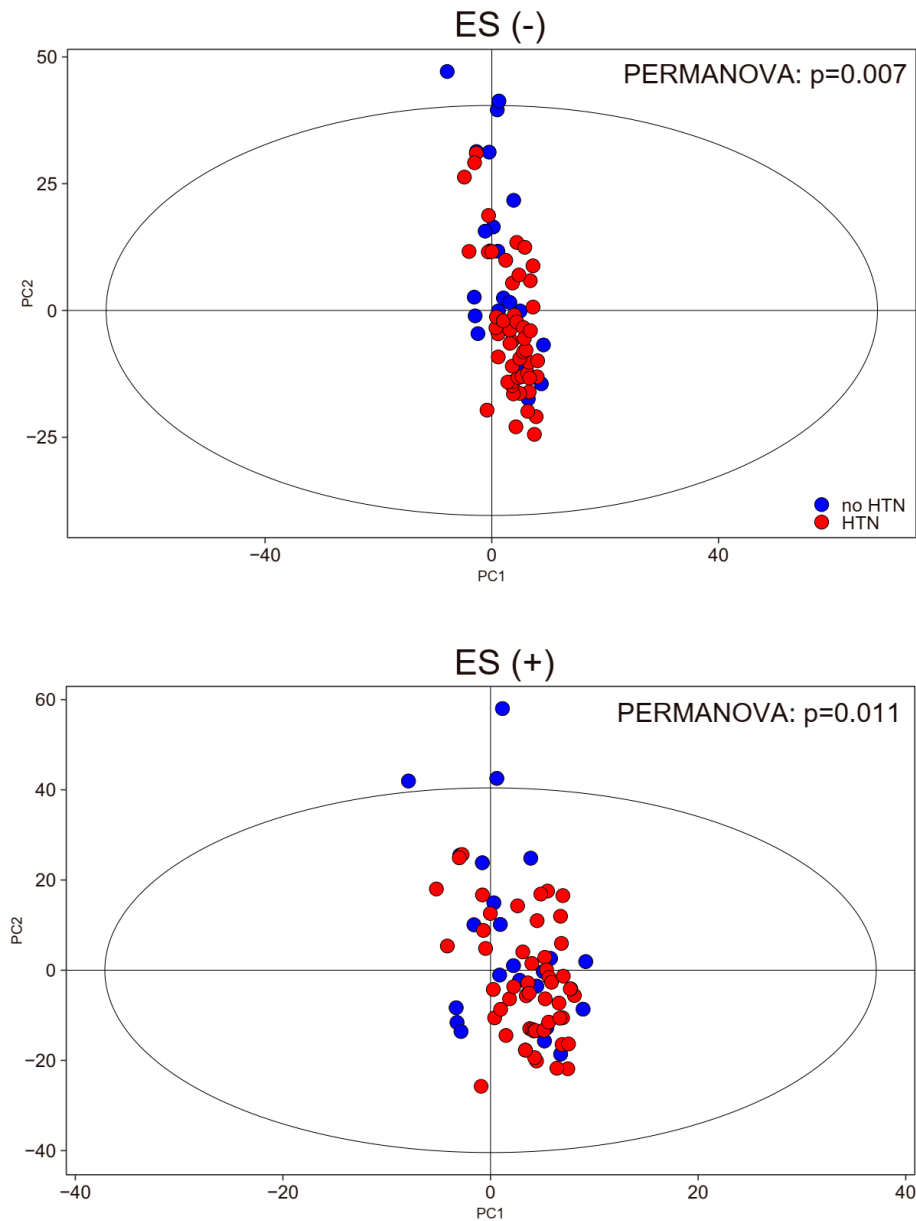

**Fig. S1 PCA plots of plasma metabolites between no HTN and HTN.** PERMANOVA (permutational analysis of variance) test was used to evaluate the overall metabolite composition between no HTN and HTN in ES (-) and ES (+). PCA: Principal component analysis. n=24:36 (no HTN vs HTN).

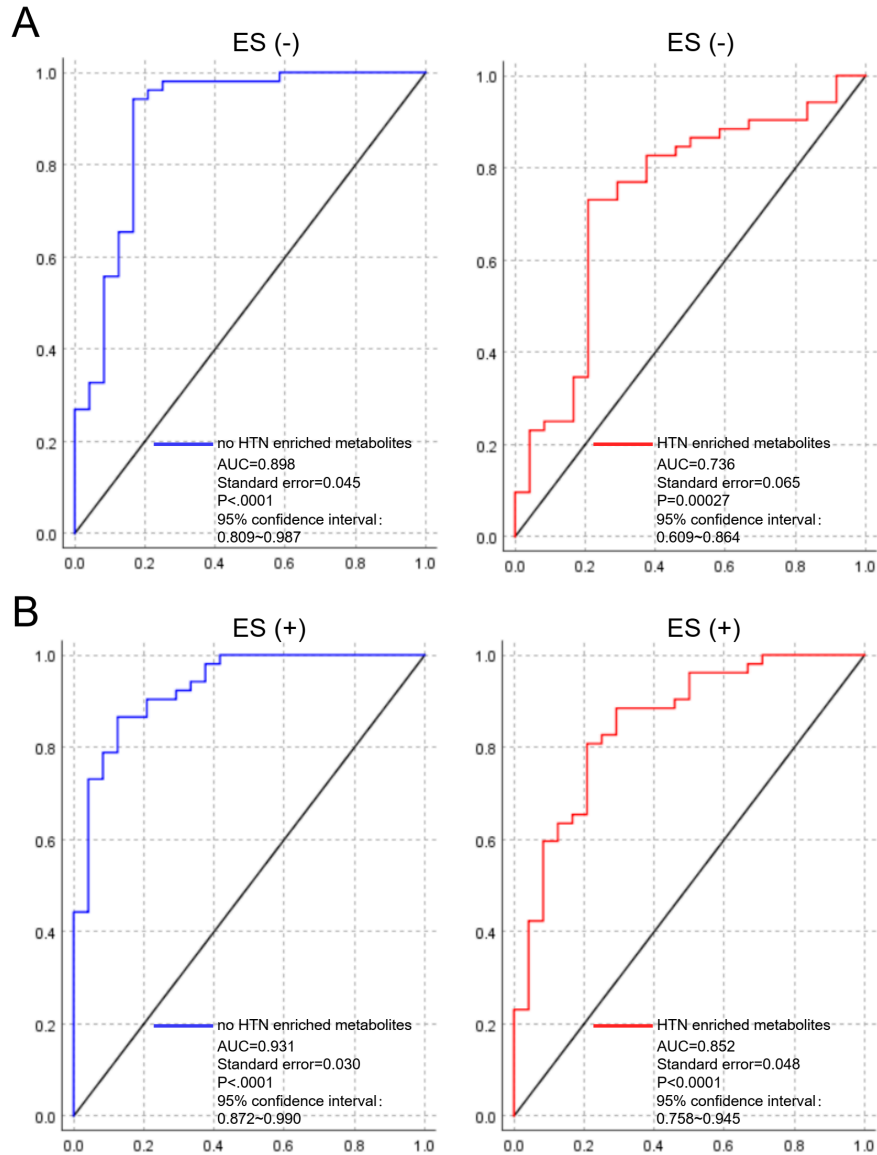

**Fig. S2 ROC curve of plasma metabolites for classification of no HTN and HTN. A-B** Metabolites enriched in no HTN and HTN were combined to construct the ROC curve in ES (-) and ES (+), respectively. n=24:36 (no HTN vs HTN).
